# Supplementary material
Source: PubMed Central journal article supplement (PMC4014189)

**c-Abl phosphorylates  $\alpha$ -syn and regulates its degradation, implication for  $\alpha$ -syn clearance and contribution to the pathogenesis of Parkinson's Disease**

**Anne-Laure Mahul-Mellier<sup>1</sup>, Bruno Fauvet<sup>1</sup>, Amanda Gysbers<sup>2</sup>, Igor Dikiy<sup>3</sup>, Abid Oueslati<sup>1</sup>, Sandrine Georgeon<sup>4</sup>, Allan J. Lamontanara<sup>4</sup>, Alejandro Bisquertt<sup>5</sup>, David Eliezer<sup>3</sup>, Eliezer Masliah<sup>5</sup>, Glenda Halliday<sup>2</sup>, Oliver Hantschel<sup>4</sup> and Hilal A. Lashuel<sup>1\*</sup>**

<sup>1</sup>Laboratory of Molecular and Chemical Biology of Neurodegeneration, Brain Mind Institute, Ecole Polytechnique Fédérale de Lausanne, 1015 Lausanne, Switzerland. <sup>2</sup>Neuroscience Research Australia and the School of Medical Sciences, University of New South Wales, Randwick, Sydney, New South Wales 2031, Australia. <sup>3</sup>Department of Biochemistry and Program in Structural Biology, Weill Cornell Medical College, New York, 10065, USA. <sup>4</sup>ISREC Foundation Chair in Translational Oncology, Swiss Institute for Experimental Cancer Research, Ecole Polytechnique Fédérale de Lausanne, 1015 Lausanne, Switzerland. <sup>5</sup> Department of Neuroscience, University of California San Diego, La Jolla, California, US.

\*To whom correspondence should be addressed at: Laboratory of Molecular and Chemical Biology of Neurodegeneration, Brain Mind Institute, Ecole Polytechnique Fédérale de Lausanne, 1015 Lausanne. Tel: +41216939691, Fax: +41216939665, Email: hilal.lashuel@epfl.ch

## Supplementary Figure Legends

### Figure S1 Validation of $\alpha$ -syn Y39 phosphorylation site-specific antibody (pY39)

(A) Antibody specificity is demonstrated using peptide dot blot. 2 $\mu$ g of recombinant  $\alpha$ -syn full length and  $\alpha$ -syn peptides with various modifications were spiked on a dot blot and probed with the purified polyclonal anti-pY39 antibody raised in rabbits. The antibody only binds to  $\alpha$ -syn peptide that is phosphorylated at residue Y39. Phosphorylation at other sites failed to show any detectable immunoreactivity.

(B) Antibody specificity is demonstrated using a blocking peptide on dot blot. 2 $\mu$ g of recombinant  $\alpha$ -syn full length or  $\alpha$ -syn phosphorylated on Y39 residue (pY39  $\alpha$ -syn) were spiked on a dot blot and probed with the purified polyclonal anti-pY39  $\alpha$ -syn antibody raised in rabbit pre-incubated with a blocking peptide (Ac- $\alpha$ -syn(33-45)-NH<sub>2</sub> pY39) or with a control peptide (Ac- $\alpha$ -syn(33-45)-NH<sub>2</sub>). The specific blocking peptide abolished the ability of the anti-pY39 antibody to detect pY39- $\alpha$ -syn

(C) Antibody specificity was also investigated using WB analysis. HEK293T cells were transfected with WT  $\alpha$ -syn or its mutants (Y39F, Y125F or Y39FY125F) together with plasmids encoding for Luciferase (LUC; negative control) or WT c-Abl or KD c-Abl (Kinase Dead mutant) or PP c-Abl (constitutively active form). Twenty-four hours post-transfection, cells were lysed and the proteins separated using SDS-PAGE and detected by WB analysis. The anti-pY39  $\alpha$ -syn antibody was able to detect at the expected size (15kDa)  $\alpha$ -syn phosphorylation at residue Y39 only when WT c-Abl or PP c-Abl were overexpressed. It is noteworthy, that non-specific bands appear at higher molecular weight only when WT or PP c-Abl is overexpressed.

(D) Immunoblot analysis for pY39  $\alpha$ -syn in non tg and  $\alpha$ -syn tg mice with the anti-pY39  $\alpha$ -syn antibody prior and after absorption with the specific pY39  $\alpha$ -syn blocking peptide demonstrating that the bands at 14 kDa are no longer detected. Total  $\alpha$ -syn was demonstrated with the monoclonal antibody from BD biosciences. Actin is the loading reference control.

(E) Immunostaining of fronto-temporal cortex sections with the anti-pY39  $\alpha$ -syn antibody showing neuronal staining and immunoreactivity in  $\alpha$ -syn tg mice but not in  $\alpha$ -syn KO mice. Bar = 10  $\mu$ m.

**(F)** Immunostaining with the anti-pY39  $\alpha$ -syn antibody in  $\alpha$ -syn tg mice before and after absorption with the specific pY39  $\alpha$ -syn blocking peptide. Pre-incubation with the peptide completely abolishes the immunostaining of neurons. Bar = 10  $\mu$ m.

**(G)** Specificity of the anti-pY39  $\alpha$ -syn antibody in primary cultures of hippocampal neurons. ICC analysis using the anti-pY39 antibody (1:250 dilution) shows a weak fluorescent signal corresponding to pY39 in WT neurons (upper panel), at an imaging threshold showing little signal in  $\alpha$ -syn KO neurons (lower panel). Higher magnification images (insets) show that pY39  $\alpha$ -syn exhibits mostly cytosolic distribution in WT neurons. Hoechst 33342 was used to counterstain nuclei.

**(H)** Non-tg and  $\alpha$ -syn tg mice immunoblots with anti-c-Abl before and after absorption with the c-Abl protein at 20 fold excess. Pre-incubation with the protein completely abolishes the detection of c-Abl by WB.

**(I)** Immunostaining with c-Abl antibody in  $\alpha$ -syn tg mice before and after absorption with specific cAbl protein. Pre-incubation with the protein completely abolishes the immunostaining of neurons. Bar = 10  $\mu$ m.

**Figure S2 *In vitro* kinase assays of  $\alpha$ -syn phosphorylation by c-Abl**

**(A)** Quantification of *in vitro* kinase assays comparing the phosphorylation of full-length WT  $\alpha$ -Syn (gray bars) to recombinant full-length CrkII (black bars) by SH2-CD c-Abl, at different substrate concentrations. Phosphorylation was measured by scintillation counting of the incorporated  $\gamma$ - $^{32}$ P-ATP as described in the methods section. Note that CrkII concentrations higher than 200  $\mu$ M could not be tested due to limitations in the protein's solubility under the assay conditions.

**(B)** Expanded  $^1\text{H}/^{15}\text{N}$  HSQC NMR spectrum of WT  $\alpha$ -syn in the presence of c-Abl at  $t=0$  (black peaks) and after  $t=5-6$  hours of phosphorylation (red peaks) and performed at pH 7.4. The two framed peaks at the bottom of the spectrum correspond to Leu38 in the unphosphorylated protein (black peak labelled '#') and in the Y39-phosphorylated form (red peak labelled '\*').

**Figure S3 c-Abl induces  $\alpha$ -syn phosphorylation on Y39 and Y125 residues in primary cultures of cortical neurons**

**(A)** Brain homogenates from non-transgenic and mThy1-h  $\alpha$ -syn WT transgenic (tg) mice from line 61 (48) (male, 6 m/o) were fractionated into membrane and cytosolic fractions and ran in SDS-PAGE gels, blotted and probed with antibodies against pY125, pY39,  $\alpha$ -syn, c-Abl and actin as previously described (53). No positive signal for pY125 and pY39  $\alpha$ -syn was detected in the cytosolic fraction. Bands in the far right are recombinant proteins that served as positive controls and molecular weight markers.

**(B)** WT (top panels) or  $\alpha$ -syn-KO (bottom panels) primary cortical neurons were infected with KD c-Abl lentivirus. Five days post-infection, neurons were immunostained with the appropriate antibodies and counterstained with DAPI to reveal the nucleus.

**Figure S4 c-Abl induces  $\alpha$ -syn phosphorylation on Y39 and Y125 residues in HeLa and M17 cells**

**(A)** HeLa cells were transfected with WT  $\alpha$ -syn or its mutants (Y39F, Y125F or Y39FY125F) together with plasmids coding for Luciferase (LUC; negative control) or WT c-Abl. Twenty-four hours post-transfection, cells were lysed and proteins separated by SDS-PAGE.  $\alpha$ -syn phosphorylation status was assessed using phosphorylation site-specific antibody for Y39 or Y125 residues.  $\alpha$ -syn and c-Abl expression were confirmed in an additional protein blot using specific antibodies. Actin was used as a loading control.

**(B)** M17 neuroblastoma cells were transfected with WT  $\alpha$ -syn or its mutants (Y39F, Y125F, or Y39FY125F) together with plasmids coding Luciferase (LUC; negative control) or WT c-Abl. Twenty-four hours post-transfection, cells were lysed and proteins separated by SDS-PAGE.  $\alpha$ -syn phosphorylation status was assessed using phosphorylation site-specific antibody for Y39 or Y125 residues.  $\alpha$ -syn and c-Abl expression were confirmed in an additional protein blot using specific antibodies. Actin was used as a loading control.

(C) HeLa cells were transfected with WT  $\alpha$ -syn together with plasmids coding for Luciferase or WT c-Abl. Twenty-four hours post-transfection the cells were immunostained with the appropriate antibodies and counterstained with DAPI to reveal the nucleus.

**Figure S5 c-Abl drug inhibitors induce  $\alpha$ -syn and c-Abl protein degradation but do not change their mRNA level**

(A) Inhibition of c-Abl activity by Nilotinib, Imatinib or GNF-2 induces the degradation of  $\alpha$ -syn and c-Abl in primary cortical neurons. Primary cultures of cortical neurons were treated with Nilotinib, Imatinib, GNF-2 or DMSO (negative control). After 16 h of treatment, cells were directly lysed in 2X Laemmli Buffer and the proteins were separated using SDS-PAGE and detected by WB analysis using the appropriate antibodies (left hand panel). Actin was used as a loading control. c-Abl and  $\alpha$ -syn protein levels were evaluated by densitometry quantification (right hand panels). Band intensities were normalized in the following manner: (c-Abl/actin) or ( $\alpha$ -syn/actin). Bars represent the mean  $\pm$  SD of three independent experiments. \*  $p < 0.05$  or \*\* $p < 0.005$  (Student's t-test: DMSO vs. c-Abl drugs inhibitor).

(B) Inhibition of c-Abl activity by Nilotinib, Imatinib or GNF-2 does not change the mRNA levels of  $\alpha$ -syn and c-Abl. Primary cultures of cortical neurons were treated with with Nilotinib, Imatinib, GNF-2 or DMSO (negative control). 16 h post-treatment, cells were lysed and mRNA extraction performed. Semi-quantitative RT-PCR using specific primers against c-Abl or  $\alpha$ -syn followed by agarose gel electrophoresis (left hand panel) demonstrates that c-Abl and  $\alpha$ -syn mRNA levels were not changed upon Nilotinib treatment. c-Abl and  $\alpha$ -syn mRNA level were evaluated by densitometry quantification (right hand panel). The band intensities were normalized using the mRNA level of the housekeeping gene GAPDH: c-Abl/GAPDH or  $\alpha$ -syn/GAPDH. The bars represent the mean  $\pm$  SD of three independent experiments.  $p > 0.05$  (Student's t-test: DMSO vs. c-Abl drugs inhibitor).

**Figure S1**

**A**

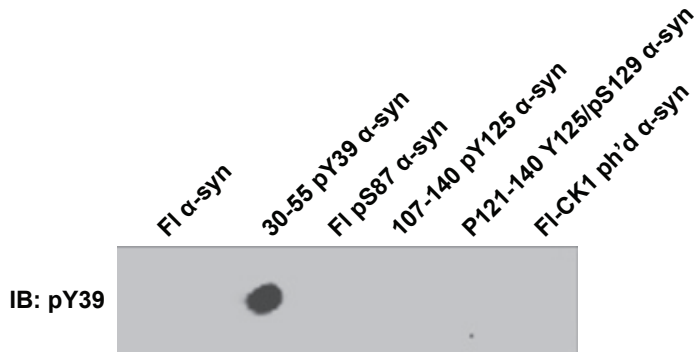

**B**

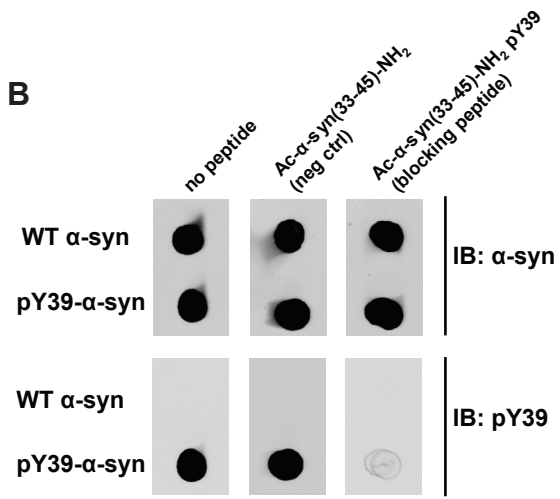

**C**

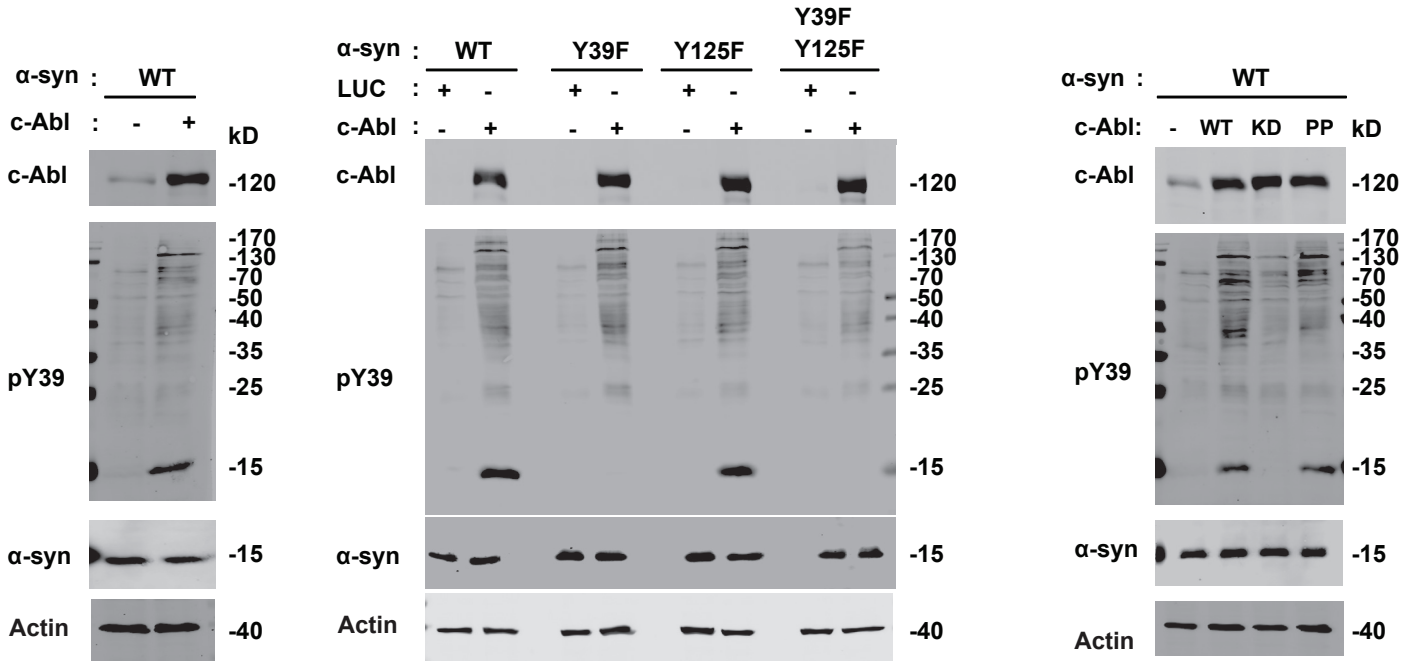

**D**

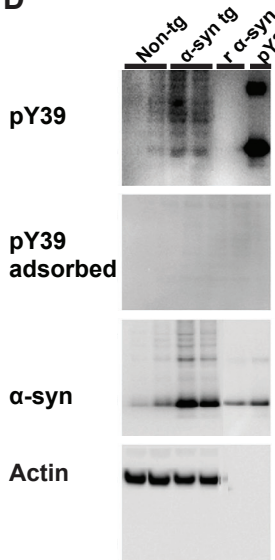

**E**

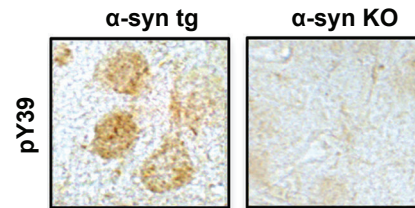

**F**

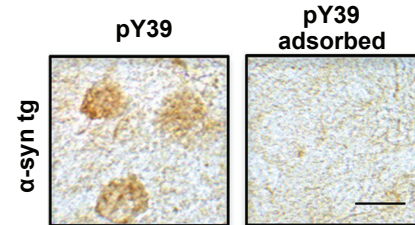

**H**

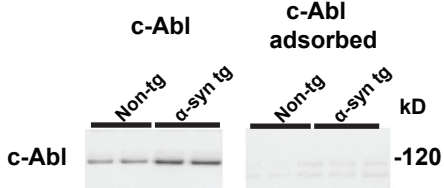

**I**

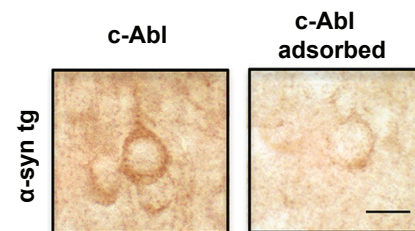

**G**

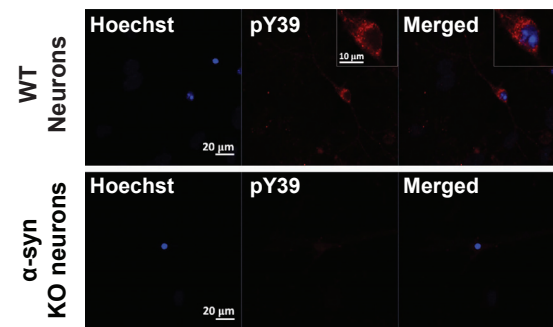

Figure S2

A

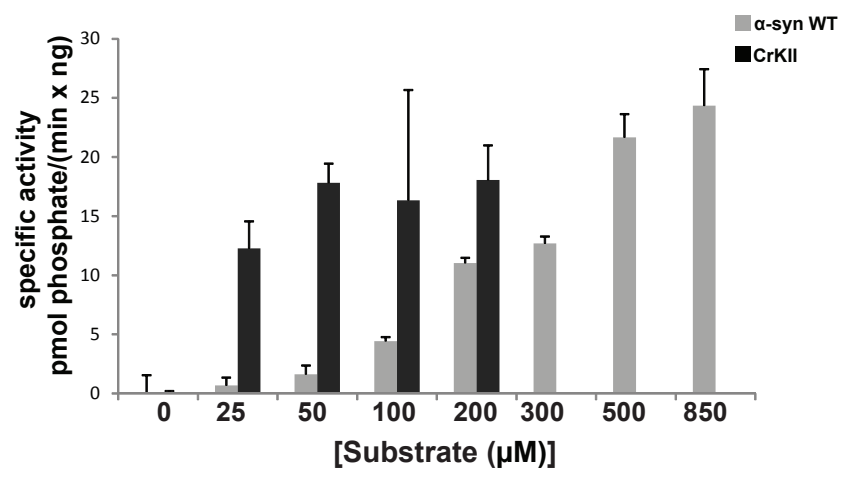

B

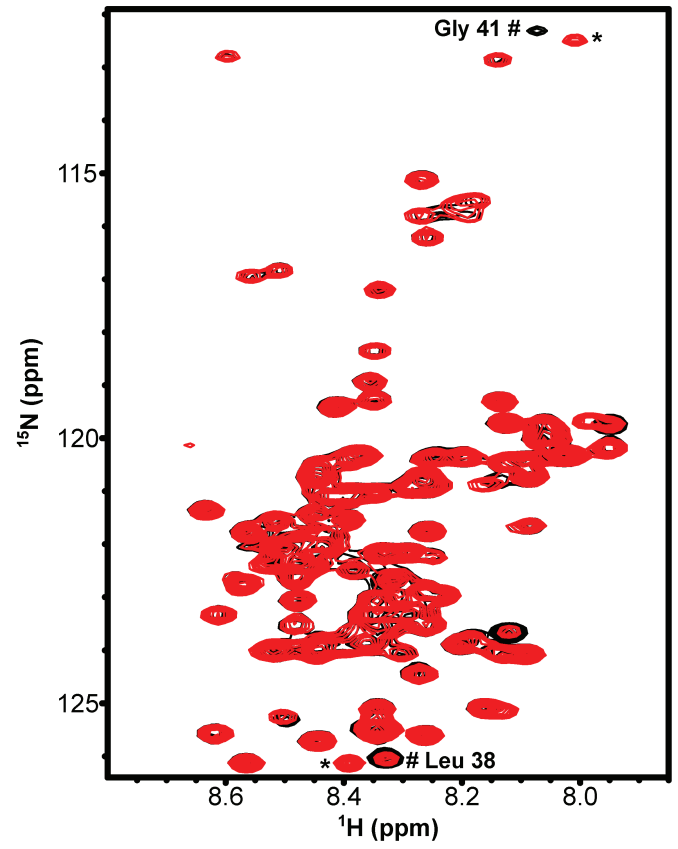

Figure S3

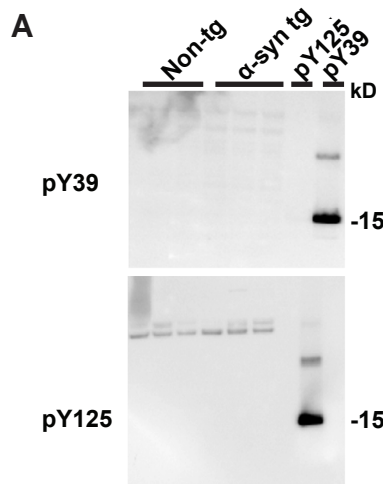

**B**

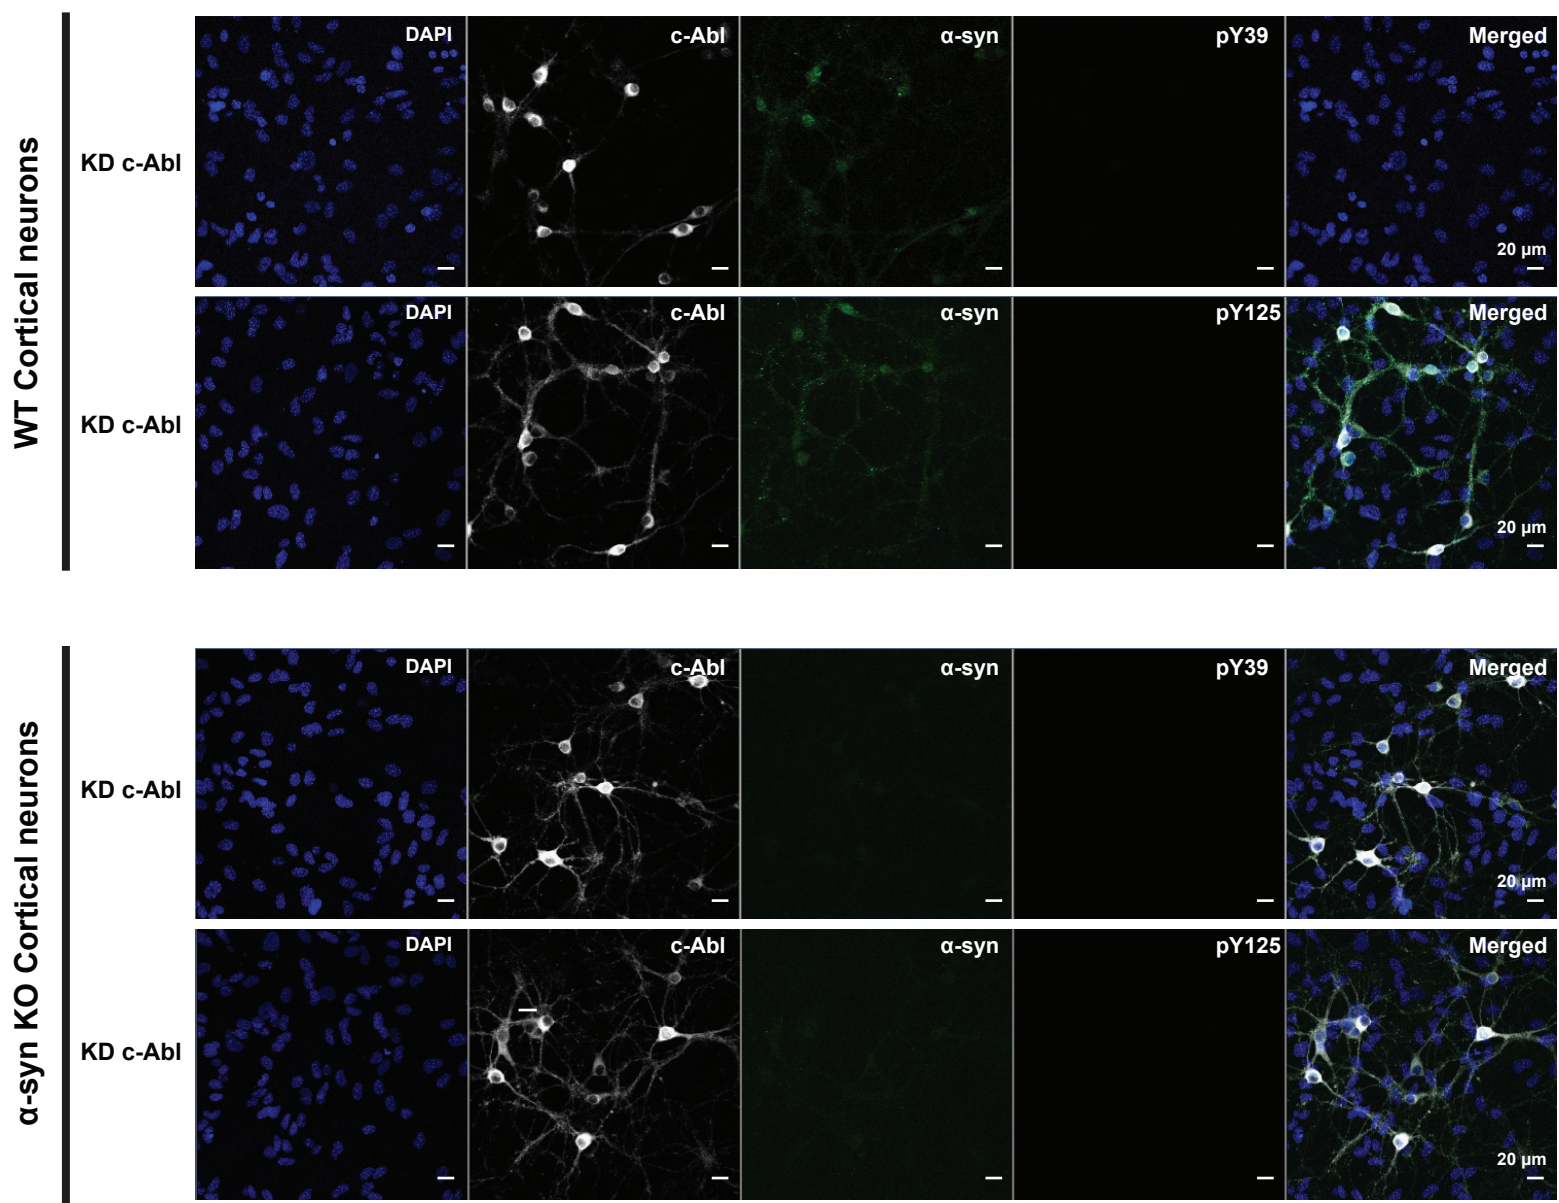



**Figure S4**

**A**

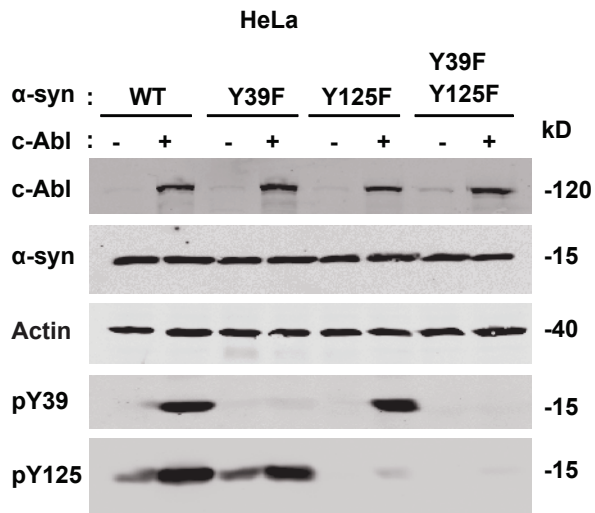

**B**

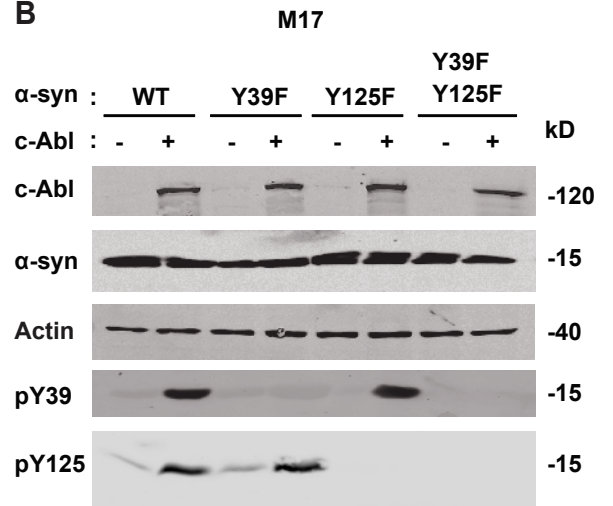

**C**

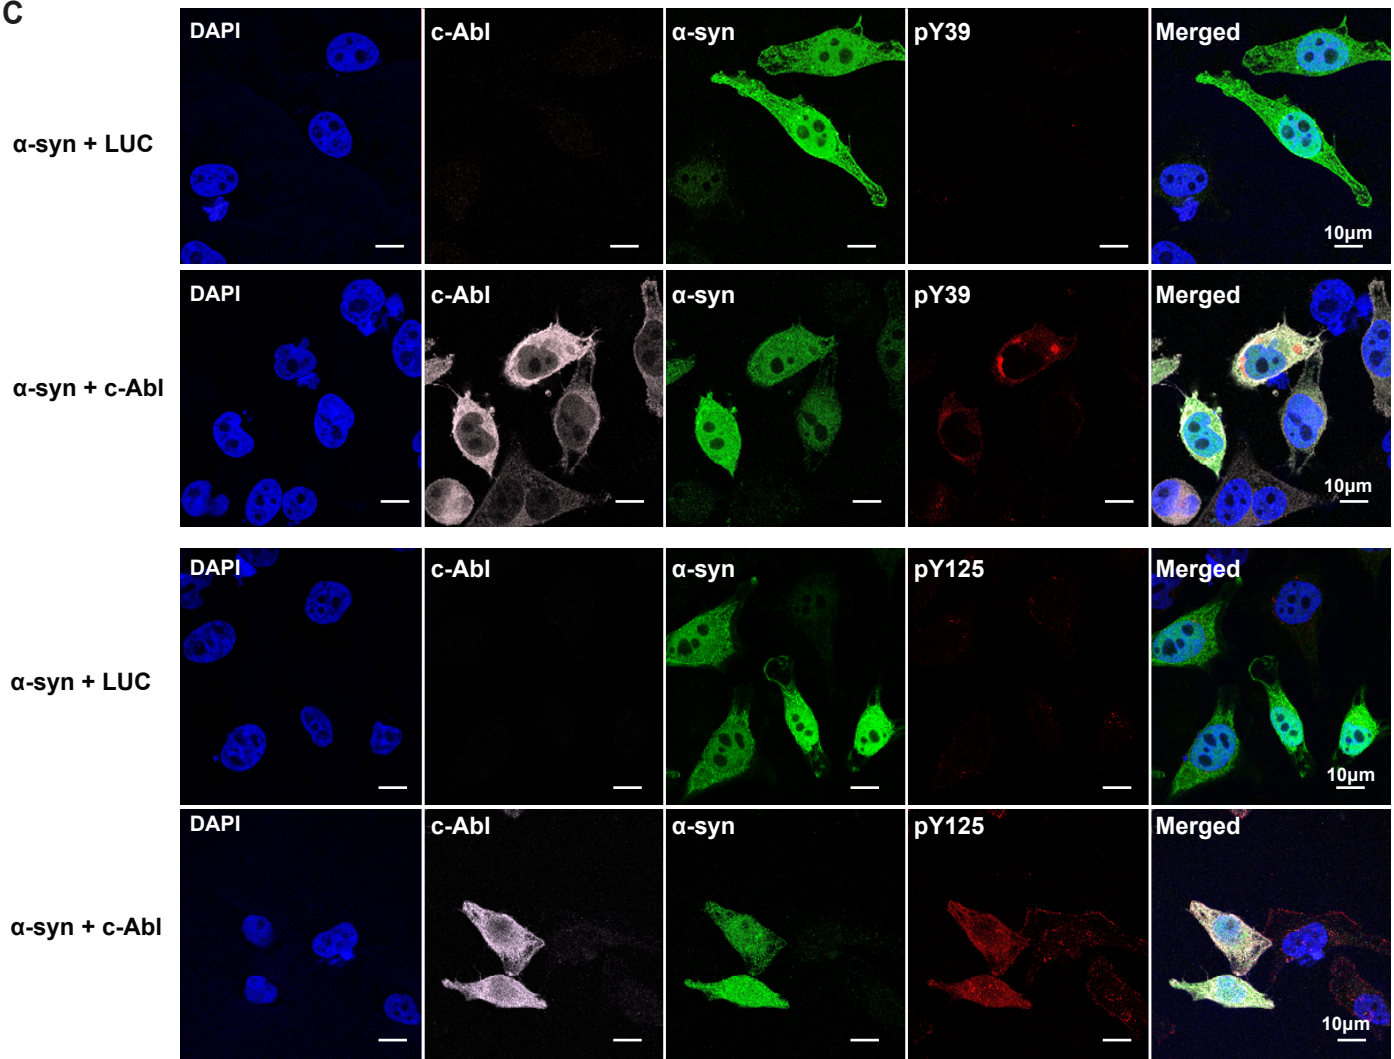

Figure S5

A

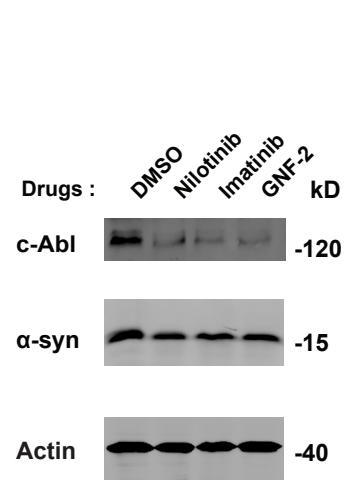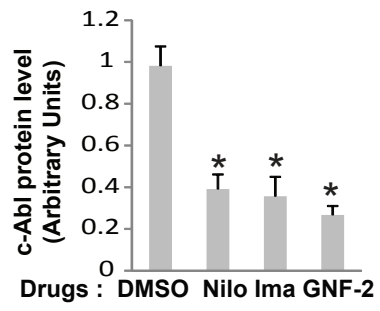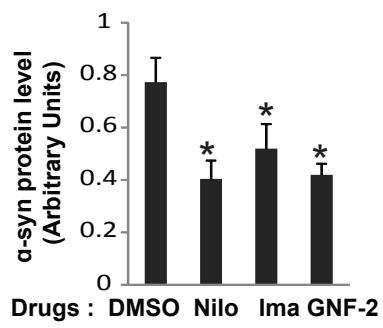

B

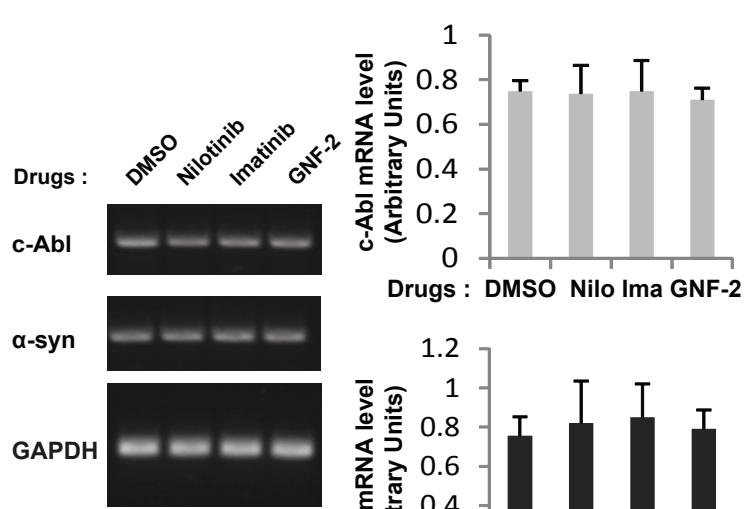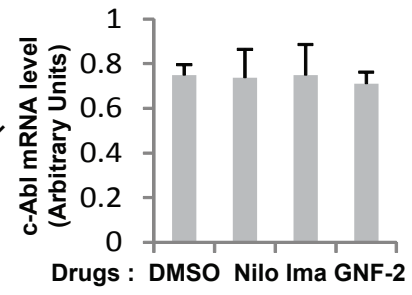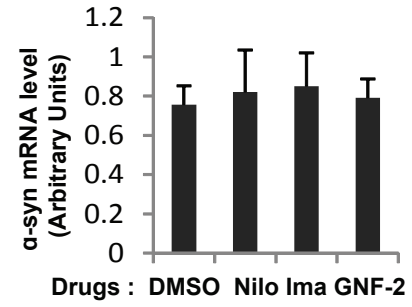

Supplement: supp_ddt674_ddt674supp.pdf [file supp_ddt674_ddt674supp.pdf]
